# Supplementary material for: An Oligopeptide-Protected Ultrasmall Gold Nanocluster with Peroxidase-Mimicking and Cellular-Imaging Capacities
Source: MDPI journal article supplement (doi:10.3390/molecules28010070), 2022-12-21
Supplement: s1 [file s1]

# An Oligopeptide-Protected Ultrasmall Gold Nanocluster with Peroxidase-Mimicking and Cellular-Imaging Capacities

## Supplementary Information

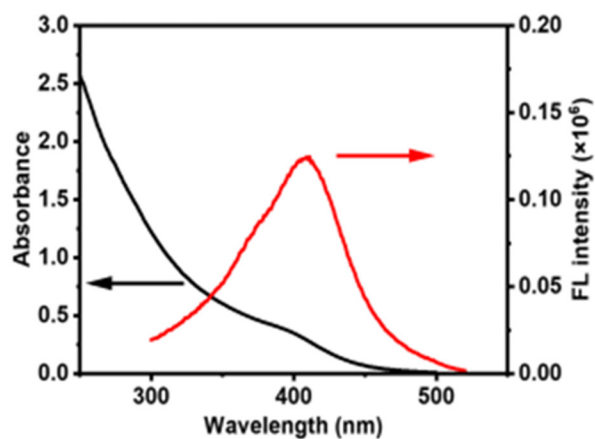

**Figure S1.** UV-vis absorption spectrum (black line) and the luminescence excitation (red line) of PGN.

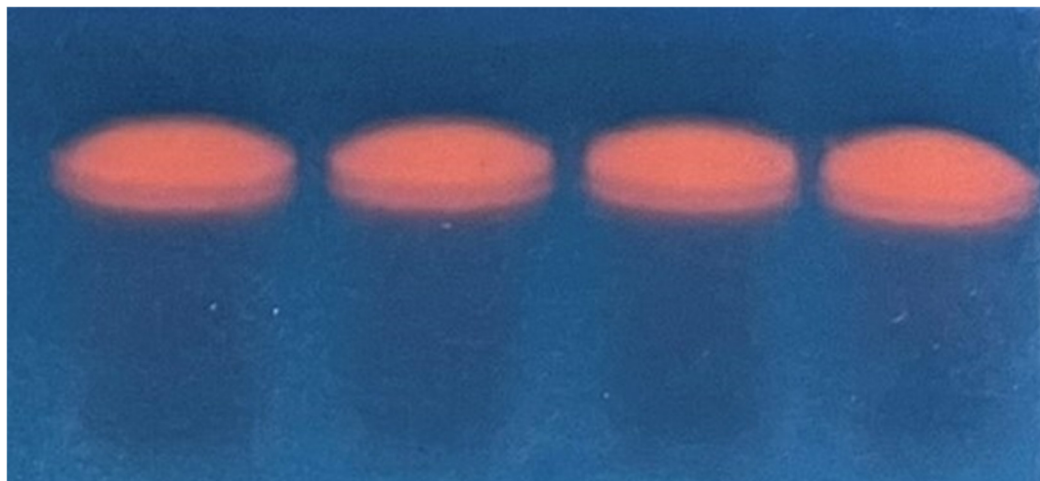

**Figure S2.** Digital photo of the PAGE bands upon UV light excitation.

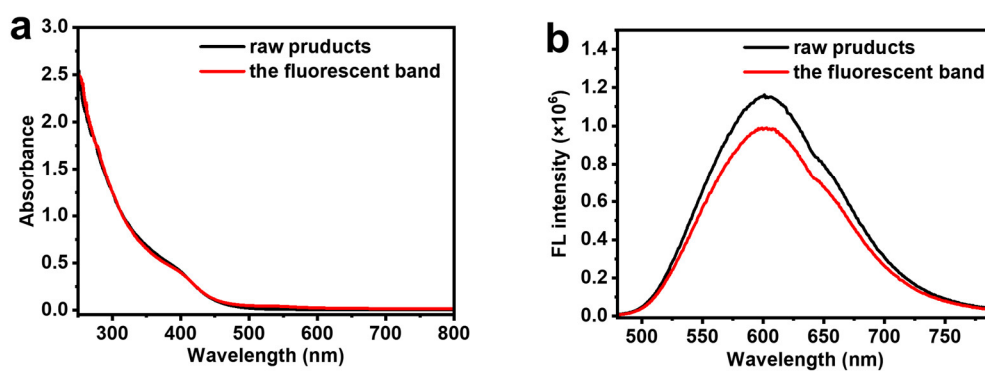

**Figure S3.** Comparison of (a) UV-Vis and (b) fluorescence intensity of the crude products and the fluorescent band.

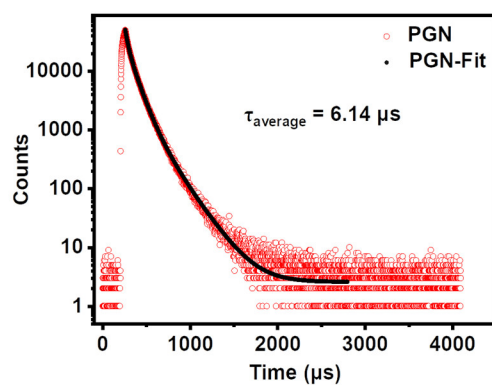

**Figure S4.** Fluorescence lifetime decays of PGN.

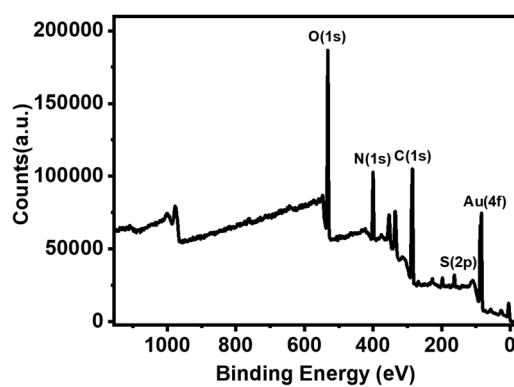

**Figure S5.** The whole XPS spectra of PGN.

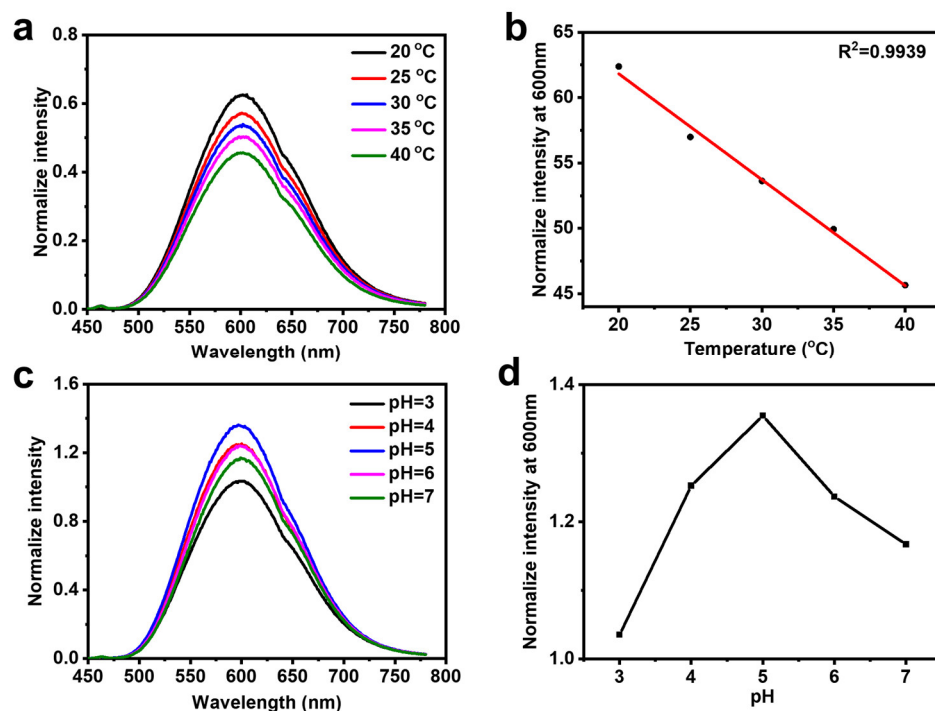

**Figure S6.** (a) Fluorescence spectra of PGN at different temperatures (from 20 to 40 °C). (b) Correlation of fluorescence intensity at 600 nm with temperature ranging from 20 to 40 °C. (c) Fluorescence spectra of PGN at different pH (from 3 to 7). (d) Correlation of fluorescence intensity at 600 nm with pH in the range of 3-7.

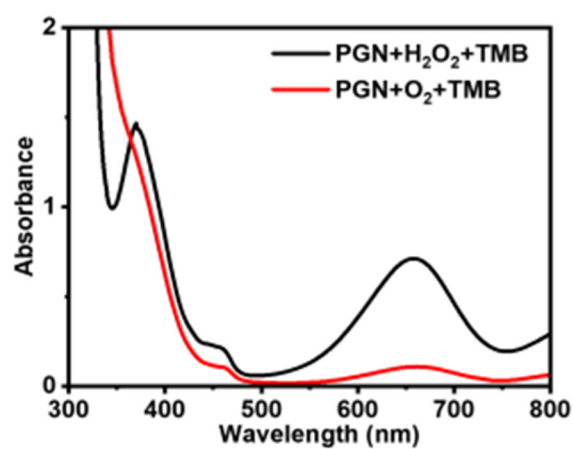

**Figure S7.** Comparison of the peroxidase-like (in presence of  $H_2O_2$ ) and the oxidase-like (in presence of dioxygen) activity of PGN.

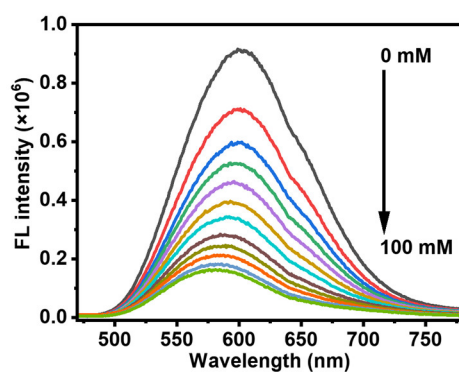

**Figure S8.** Fluorescence changes of the PGN-TMB system after adding  $\text{H}_2\text{O}_2$  at different concentrations (0,5,10,20,30,40,50,60,70,80,90 and 100mM).

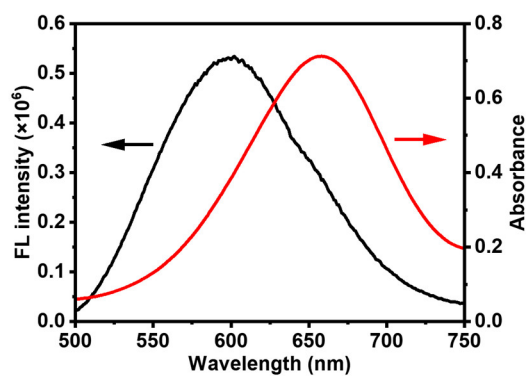

**Figure S9.** Emission spectra of PGN (black line) and UV-Vis absorption spectra of the PGN-TMB- $\text{H}_2\text{O}_2$  system (red line).

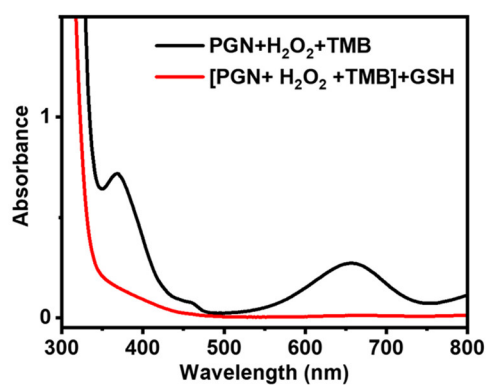

**Figure S10.** The UV-Vis spectrum of PGN+ $\text{H}_2\text{O}_2$ +TMB before and after adding GSH.

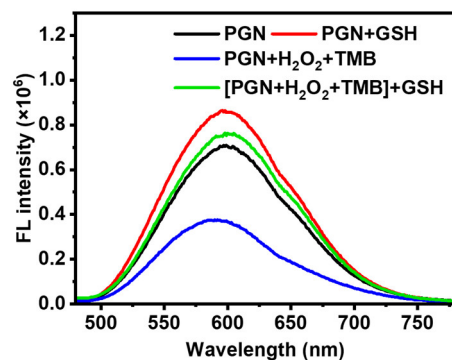

**Figure S11.** Fluorescence spectrum of PGN; PGN+GSH; PGN+H<sub>2</sub>O<sub>2</sub>+TMB and [PGN+H<sub>2</sub>O<sub>2</sub>+TMB] + GSH.

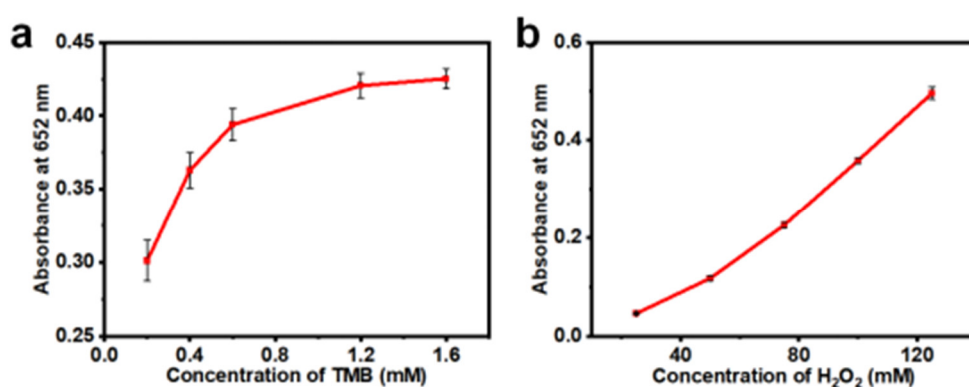

**Figure S12.** (a) The absorption peak at 652 nm in the presence of different concentrations of TMB (0.2, 0.4, 0.6, 1.2, 1.6 mM). (b) The absorption peak at 652 nm in the presence of different concentrations of H<sub>2</sub>O<sub>2</sub> (25, 50, 75, 100, 125 mM). The concentration of the GSH-Au NCs was fixed at 100  $\mu$ M (Au basis).

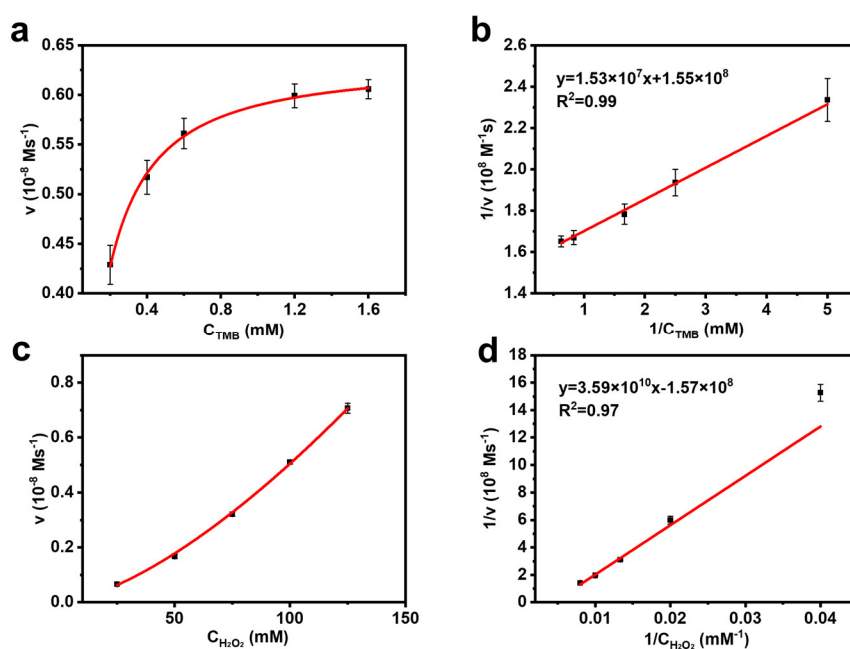

**Figure S13.** Steady-state kinetic assay and catalytic mechanism of the synthesized GSH-Au NCs towards various components: (a, b) 1 mM TMB and different concentrations of H<sub>2</sub>O<sub>2</sub>, (c, d) 100 mM H<sub>2</sub>O<sub>2</sub> and different concentrations of TMB.

**Table S1.** Comparison of kinetic parameters of  $K_m$  and  $K_{cat}$  of PGN, and GSH-Au NCs.

| Catalyst   | Substrate                     | $K_m$ (mM) | $K_{cat}$ (s <sup>-1</sup> ) | Reference |
|------------|-------------------------------|------------|------------------------------|-----------|
| PGN        | TMB                           | 0.31       | $8 \times 10^{-5}$           | This work |
|            | H <sub>2</sub> O <sub>2</sub> | 1069       | $5.35 \times 10^{-4}$        |           |
| GSH-Au NCs | TMB                           | 0.0987     | $6.45 \times 10^{-5}$        | [23]      |
|            | H <sub>2</sub> O <sub>2</sub> | 228.66     | $6.37 \times 10^{-5}$        |           |
